# Supplementary material for: Synthesis of Mn2O3nanomaterials with controllable porosity and thickness for enhanced lithium-ion batteries performance
Source: Royal Society of Chemistry journal article supplement (doi:10.1039/c3nr05551e), 2013-11-04
Supplement: c3nr05551e.pdf [file c3nr05551e.pdf]

# Synthesis of $\text{Mn}_2\text{O}_3$ Nanomaterials with Controllable Porosity and Thickness for Enhanced Lithium-ion Batteries Performance

Xing Zhang,<sup>a</sup> Yitai Qian,<sup>\*ab</sup> Yongchun Zhu,<sup>\*a</sup> and Kaibin Tang<sup>a</sup>

<sup>a</sup> Hefei National Laboratory for Physical Sciences at Microscale and Department of Chemistry, University of Science and Technology of China, Hefei, 230026, China

<sup>b</sup> School of Chemistry and Chemical Engineering, Shandong University, Jinan, 250100, China

**\*Corresponding author:**

Xing Zhang, Fax: +86-551-63607234; E-mail: [ytqian@ustc.edu.cn](mailto:ytqian@ustc.edu.cn)

---

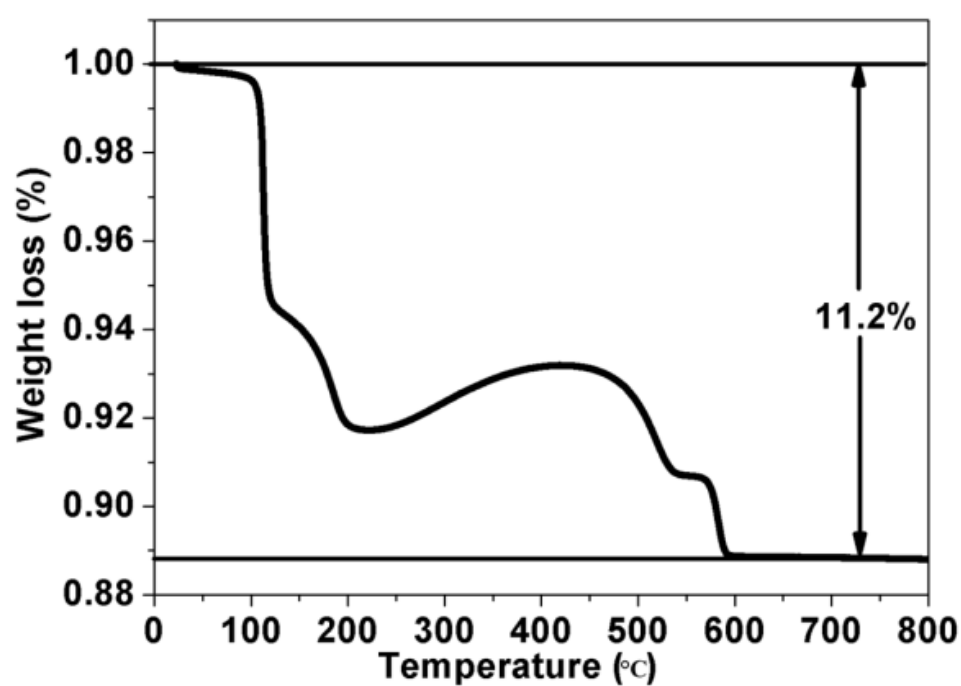

**Figure S1** TGA curve of as prepared precursor Mn(OH)<sub>2</sub> in air.

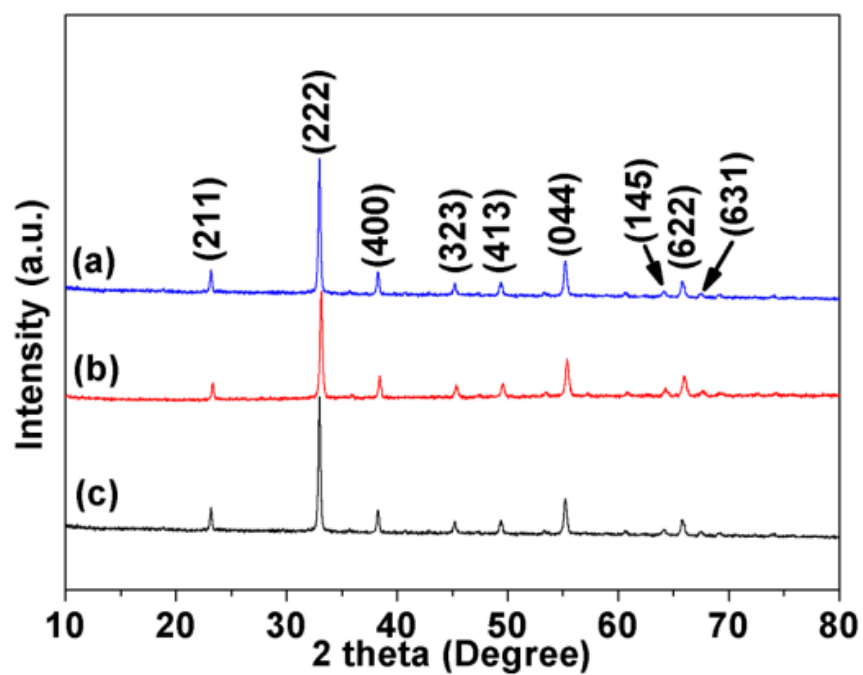

**Figure S2** The XRD patterns of the products thermal treatment  $\text{Mn(OH)}_2$  precursor, which prepared in different EG/ $\text{H}_2\text{O}$  volume ratios: (a) S-2, (b) S-3 and (c) S-4.
